# Supplementary material for: KLn(MoO4)2 micro/nanocrystals (Ln = La–Lu, Y): systematic hydrothermal crystallization, structure, and the performance of doped Eu3+ for optical thermometry
Source: Royal Society of Chemistry journal article supplement (doi:10.1039/d1dt03642d), 2021-01-01
Supplement: d1dt03642d1.pdf [file d1dt03642d1.pdf]

## Supplementary Information

### **KLn(MoO<sub>4</sub>)<sub>2</sub> micro/nanocrystals (Ln = La-Lu, Y): systematic hydrothermal crystallization, structure, and the performance of doped Eu<sup>3+</sup> for optical thermometry**

Zhixin Xu<sup>a,b</sup>, Panpan Du<sup>a,b</sup>, Qi Zhu<sup>a</sup>, Xiaodong Li<sup>a</sup>, Xudong Sun<sup>a,c</sup>, Ji-Guang Li<sup>b\*</sup>

<sup>a</sup> *Key Laboratory for Anisotropy and Texture of Materials (Ministry of Education), School of Materials Science and Engineering, Northeastern University, Shenyang, Liaoning 110819, China*

<sup>b</sup> *Research Center for Functional Materials, National Institute for Materials Science, Namiki 1-1, Tsukuba, Ibaraki 305-0044, Japan*

<sup>c</sup> *Foshan Graduate School of Northeastern University, Foshan, Guangdong 528311, China*

\*Corresponding author:

Dr. Ji-Guang Li

National Institute for Materials Science

Tel: +81-29-860-4394

E-mail: [LI.Jiguang@nims.go.jp](mailto:LI.Jiguang@nims.go.jp)

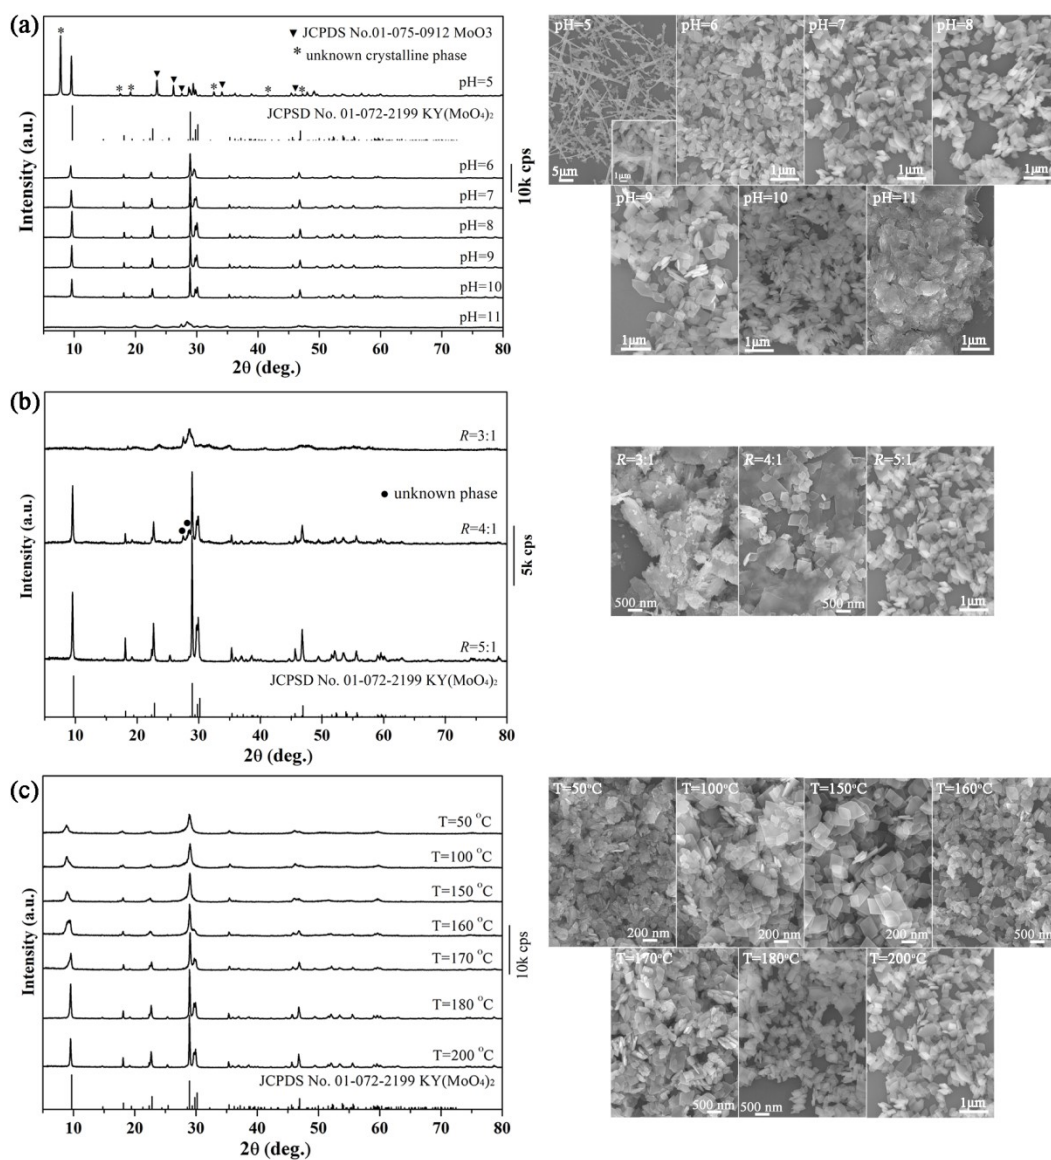

Fig. S1. XRD patterns (left part) and crystallite morphology (right part) for the Ln = Y samples prepared under (a) different pH values when  $R = 5$  and  $T = 200$  °C, (b) different  $R$  values when pH = 7 and  $T = 200$  °C, and (c) different hydrothermal temperatures when pH = 7 and  $R = 5$ .

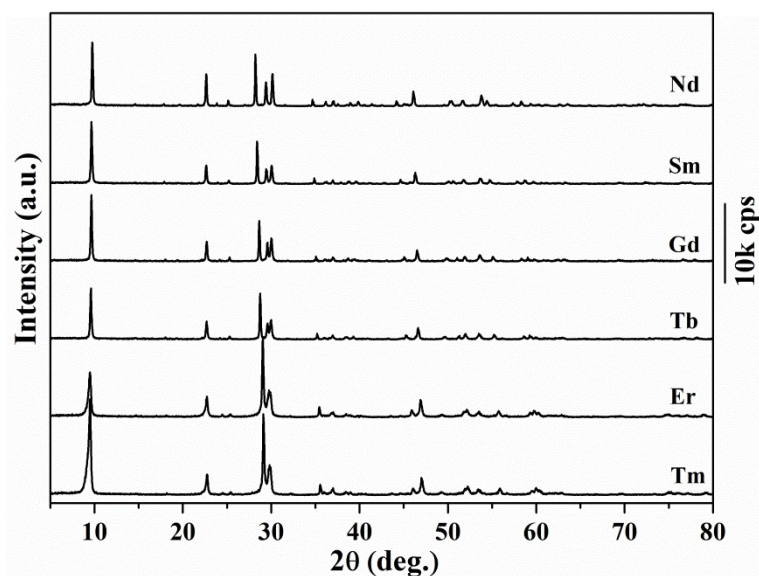

Fig. S2. XRD patterns of the hydrothermal products for Ln = Nd, Sm, Gd, Tb, Er and Tm.

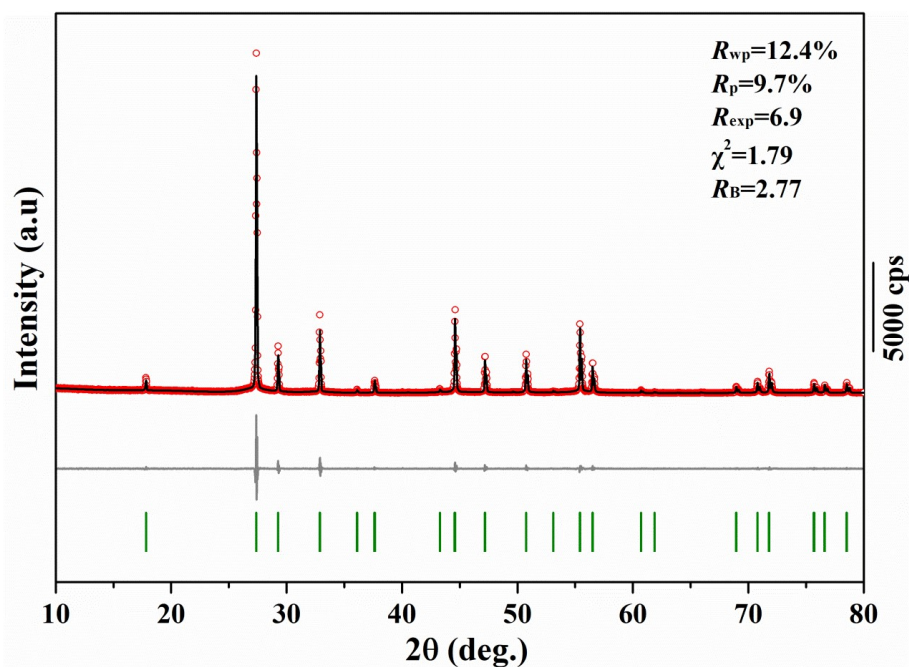

Fig. S3. Rietveld refinement of the XRD pattern for monoclinic  $\text{KLa}(\text{MoO}_4)_2$ .

Table S1. Fractional atomic coordinates ( $x, y, z$ ) and main bond lengths ( $\text{\AA}$ ) for the orthorhombic structure of  $\text{KLa}(\text{MoO}_4)_2$ .

|    | Coordinates |          |           | Bond length        |          |                     |          |
|----|-------------|----------|-----------|--------------------|----------|---------------------|----------|
|    | $x$         | $y$      | $z$       |                    |          |                     |          |
| K  | 0.25        | 0.636(2) | 0         | K-O1( $\times 2$ ) | 2.653(4) | La-O1( $\times 2$ ) | 2.565(3) |
| La | 0.25        | 0.622(8) | 0         | K-O1( $\times 2$ ) | 2.700(1) | La-O1( $\times 2$ ) | 2.581(8) |
| Mo | 0.25        | 0.125(8) | 0         | K-O2( $\times 2$ ) | 2.502(3) | La-O2( $\times 2$ ) | 2.573(1) |
| O1 | 0.010 (3)   | 0.040(7) | 0.240(3)  | K-O2( $\times 2$ ) | 2.508(8) | La-O2( $\times 2$ ) | 2.635(2) |
| O2 | 0.0069(3)   | 0.207(2) | -0.152(4) | Mo-O1              | 1.855(9) | Mo-O2               | 1.854(6) |

**Table S2.** The 2Theta ( $^{\circ}$ ),  $d$ -spacing ( $\text{\AA}$ ) and Miller index ( $h, k, l$ ) derived via Rietveld refinement of the XRD pattern for  $\text{KY}(\text{MoO}_4)_2$ .

| No. | 2Theta ( $^{\circ}$ ) | $d$ -spacing ( $\text{\AA}$ ) | $h$ | $k$ | $l$ |
|-----|-----------------------|-------------------------------|-----|-----|-----|
| 1   | 9.579                 | 9.22545                       | 0   | 2   | 0   |
| 2   | 14.704                | 6.01965                       | 0   | 2   | 1   |
| 3   | 18.105                | 4.89571                       | 1   | 1   | 0   |
| 4   | 19.226                | 4.61273                       | 0   | 4   | 0   |
| 5   | 21.302                | 4.16777                       | 1   | 1   | 1   |
| 6   | 22.365                | 3.97187                       | 0   | 0   | 2   |
| 7   | 22.691                | 3.91565                       | 1   | 3   | 0   |
| 8   | 24.379                | 3.64813                       | 0   | 2   | 2   |
| 9   | 25.339                | 3.51215                       | 1   | 3   | 1   |
| 10  | 28.431                | 3.13681                       | 1   | 4   | 1   |
| 11  | 28.508                | 3.12847                       | 1   | 0   | 2   |
| 12  | 28.924                | 3.08444                       | 1   | 1   | 2   |
| 13  | 29.013                | 3.07515                       | 0   | 6   | 0   |
| 14  | 29.657                | 3.00983                       | 0   | 4   | 2   |
| 15  | 29.908                | 2.98514                       | 1   | 5   | 0   |
| 16  | 32.003                | 2.79435                       | 1   | 5   | 1   |
| 17  | 35.324                | 2.53886                       | 2   | 0   | 0   |
| 18  | 35.936                | 2.49705                       | 1   | 6   | 1   |
| 19  | 36.683                | 2.44785                       | 2   | 2   | 0   |
| 20  | 36.938                | 2.43155                       | 0   | 6   | 2   |
| 21  | 37.665                | 2.38631                       | 1   | 5   | 2   |
| 22  | 38.626                | 2.32907                       | 1   | 1   | 3   |
| 23  | 39.022                | 2.30636                       | 0   | 8   | 0   |
| 24  | 39.198                | 2.29644                       | 0   | 4   | 3   |
| 25  | 39.576                | 2.27532                       | 1   | 2   | 3   |
| 26  | 40.029                | 2.25061                       | 2   | 3   | 1   |
| 27  | 40.15                 | 2.24413                       | 1   | 7   | 1   |
| 28  | 40.525                | 2.22421                       | 2   | 4   | 0   |
| 29  | 40.703                | 2.2149                        | 0   | 8   | 1   |
| 30  | 41.119                | 2.19346                       | 1   | 3   | 3   |
| 31  | 42.212                | 2.13917                       | 2   | 0   | 2   |
| 32  | 43.202                | 2.0924                        | 1   | 4   | 3   |
| 33  | 43.387                | 2.08389                       | 2   | 2   | 2   |
| 34  | 44.596                | 2.03016                       | 1   | 8   | 1   |
| 35  | 44.77                 | 2.02269                       | 2   | 5   | 1   |
| 36  | 45.438                | 1.99449                       | 0   | 8   | 2   |
| 37  | 45.645                | 1.98594                       | 0   | 0   | 4   |
| 38  | 46.752                | 1.94146                       | 0   | 2   | 4   |
| 39  | 46.773                | 1.94064                       | 2   | 4   | 2   |
| 40  | 47.81                 | 1.90094                       | 2   | 6   | 1   |
| 41  | 48.759                | 1.86613                       | 1   | 6   | 3   |

---

|    |        |         |   |    |   |
|----|--------|---------|---|----|---|
| 42 | 49.031 | 1.85642 | 1 | 8  | 2 |
| 43 | 49.352 | 1.84509 | 0 | 10 | 0 |
| 44 | 50.751 | 1.79746 | 2 | 2  | 3 |
| 45 | 51.224 | 1.78197 | 2 | 7  | 1 |
| 46 | 51.559 | 1.77116 | 1 | 3  | 4 |
| 47 | 52.035 | 1.75608 | 2 | 6  | 2 |
| 48 | 52.029 | 1.75628 | 2 | 3  | 3 |
| 49 | 52.127 | 1.75319 | 1 | 7  | 3 |
| 50 | 52.58  | 1.73915 | 0 | 8  | 3 |
| 51 | 53.388 | 1.71472 | 1 | 9  | 2 |
| 52 | 53.644 | 1.70714 | 2 | 8  | 0 |
| 53 | 54.389 | 1.68549 | 3 | 1  | 0 |
| 54 | 54.997 | 1.66829 | 0 | 6  | 4 |
| 55 | 55.259 | 1.661   | 2 | 7  | 2 |
| 56 | 55.533 | 1.65346 | 1 | 5  | 4 |
| 57 | 55.704 | 1.64879 | 3 | 1  | 1 |
| 58 | 56.332 | 1.6319  | 3 | 3  | 0 |
| 59 | 57.617 | 1.59852 | 3 | 3  | 1 |
| 60 | 57.847 | 1.5927  | 1 | 11 | 0 |
| 61 | 57.984 | 1.58928 | 1 | 10 | 2 |
| 62 | 58.158 | 1.58494 | 1 | 6  | 4 |
| 63 | 58.591 | 1.57425 | 2 | 6  | 3 |
| 64 | 58.83  | 1.5684  | 2 | 8  | 2 |
| 65 | 58.942 | 1.5657  | 0 | 2  | 5 |
| 66 | 59.021 | 1.5638  | 2 | 9  | 1 |
| 67 | 59.003 | 1.56423 | 2 | 0  | 4 |
| 68 | 59.111 | 1.56163 | 1 | 11 | 1 |
| 69 | 59.235 | 1.55864 | 2 | 1  | 4 |
| 70 | 59.258 | 1.55811 | 3 | 4  | 1 |
| 71 | 59.301 | 1.55709 | 3 | 0  | 2 |
| 72 | 59.533 | 1.55157 | 3 | 1  | 2 |
| 73 | 59.844 | 1.54425 | 1 | 9  | 3 |
| 74 | 59.93  | 1.54222 | 2 | 2  | 4 |
| 75 | 60.13  | 1.53758 | 0 | 12 | 0 |
| 76 | 60.092 | 1.53846 | 3 | 5  | 0 |
| 77 | 60.225 | 1.53537 | 3 | 2  | 2 |
| 78 | 61.078 | 1.51597 | 2 | 3  | 4 |
| 79 | 61.174 | 1.51382 | 0 | 10 | 3 |
| 80 | 61.166 | 1.51399 | 1 | 7  | 4 |
| 81 | 61.293 | 1.51117 | 1 | 1  | 5 |
| 82 | 61.365 | 1.50956 | 0 | 12 | 1 |
| 83 | 61.327 | 1.5104  | 3 | 5  | 1 |
| 84 | 61.369 | 1.50946 | 3 | 3  | 2 |
| 85 | 61.575 | 1.50491 | 0 | 8  | 4 |

---

---

|     |        |         |   |    |   |
|-----|--------|---------|---|----|---|
| 86  | 61.587 | 1.50466 | 2 | 7  | 3 |
| 87  | 61.701 | 1.50215 | 0 | 4  | 5 |
| 88  | 61.974 | 1.49619 | 1 | 2  | 5 |
| 89  | 62.141 | 1.49257 | 2 | 10 | 0 |
| 90  | 62.663 | 1.48137 | 2 | 4  | 4 |
| 91  | 62.722 | 1.48013 | 2 | 9  | 2 |
| 92  | 62.809 | 1.47828 | 1 | 11 | 2 |
| 93  | 62.95  | 1.4753  | 3 | 4  | 2 |
| 94  | 63.099 | 1.47218 | 1 | 3  | 5 |
| 95  | 63.353 | 1.4669  | 2 | 10 | 1 |
| 96  | 63.803 | 1.45763 | 3 | 6  | 1 |
| 97  | 64.143 | 1.45072 | 1 | 10 | 3 |
| 98  | 64.329 | 1.44697 | 1 | 12 | 1 |
| 99  | 64.534 | 1.44288 | 1 | 8  | 4 |
| 100 | 64.656 | 1.44044 | 1 | 4  | 5 |
| 101 | 64.669 | 1.44019 | 2 | 5  | 4 |
| 102 | 64.942 | 1.4348  | 2 | 8  | 3 |
| 103 | 64.988 | 1.43388 | 0 | 12 | 2 |
| 104 | 64.951 | 1.4346  | 3 | 5  | 2 |
| 105 | 65.484 | 1.42422 | 3 | 7  | 0 |
| 106 | 65.605 | 1.42188 | 3 | 1  | 3 |
| 107 | 66.149 | 1.4115  | 0 | 6  | 5 |
| 108 | 66.262 | 1.40938 | 3 | 2  | 3 |
| 109 | 66.629 | 1.40249 | 1 | 5  | 5 |
| 110 | 66.663 | 1.40187 | 3 | 7  | 1 |
| 111 | 66.916 | 1.39718 | 2 | 10 | 2 |
| 112 | 67.076 | 1.39422 | 2 | 6  | 4 |
| 113 | 67.354 | 1.38916 | 3 | 6  | 2 |
| 114 | 67.348 | 1.38926 | 3 | 3  | 3 |
| 115 | 67.865 | 1.37992 | 1 | 12 | 2 |
| 116 | 67.957 | 1.37828 | 2 | 11 | 1 |
| 117 | 68.24  | 1.37326 | 1 | 9  | 4 |
| 118 | 68.601 | 1.36691 | 1 | 13 | 0 |
| 119 | 68.637 | 1.36629 | 2 | 9  | 3 |
| 120 | 68.72  | 1.36483 | 1 | 11 | 3 |
| 121 | 68.855 | 1.36248 | 3 | 4  | 3 |
| 122 | 69.002 | 1.35994 | 1 | 6  | 5 |
| 123 | 69.481 | 1.35173 | 0 | 10 | 4 |
| 124 | 69.754 | 1.34711 | 1 | 13 | 1 |
| 125 | 69.868 | 1.34519 | 2 | 7  | 4 |
| 126 | 69.888 | 1.34485 | 3 | 8  | 1 |
| 127 | 69.986 | 1.34321 | 2 | 1  | 5 |
| 128 | 70.14  | 1.34064 | 3 | 7  | 2 |
| 129 | 70.622 | 1.33266 | 2 | 2  | 5 |

---

---

|     |        |         |   |    |   |
|-----|--------|---------|---|----|---|
| 130 | 70.805 | 1.32966 | 0 | 12 | 3 |
| 131 | 70.77  | 1.33023 | 3 | 5  | 3 |
| 132 | 71.157 | 1.32396 | 0 | 0  | 6 |
| 133 | 71.405 | 1.31996 | 2 | 11 | 2 |
| 134 | 71.532 | 1.31792 | 0 | 14 | 0 |
| 135 | 71.704 | 1.31519 | 2 | 12 | 0 |
| 136 | 71.677 | 1.31561 | 2 | 3  | 5 |
| 137 | 71.759 | 1.31432 | 1 | 7  | 5 |
| 138 | 71.999 | 1.31053 | 0 | 2  | 6 |
| 139 | 72.136 | 1.30837 | 0 | 8  | 5 |
| 140 | 72.273 | 1.30624 | 1 | 10 | 4 |
| 141 | 72.338 | 1.30522 | 3 | 9  | 0 |
| 142 | 72.665 | 1.30015 | 0 | 14 | 1 |
| 143 | 72.659 | 1.30023 | 2 | 10 | 3 |
| 144 | 72.835 | 1.29753 | 2 | 12 | 1 |
| 145 | 73.028 | 1.29457 | 2 | 8  | 4 |
| 146 | 73.081 | 1.29376 | 3 | 6  | 3 |
| 147 | 73.164 | 1.29251 | 1 | 13 | 2 |
| 148 | 73.144 | 1.29281 | 2 | 4  | 5 |
| 149 | 73.295 | 1.29051 | 3 | 8  | 2 |
| 150 | 73.465 | 1.28795 | 3 | 9  | 1 |
| 151 | 73.449 | 1.28819 | 3 | 0  | 4 |
| 152 | 73.575 | 1.28629 | 1 | 12 | 3 |
| 153 | 73.658 | 1.28506 | 3 | 1  | 4 |
| 154 | 73.921 | 1.28113 | 1 | 0  | 6 |
| 155 | 74.129 | 1.27805 | 1 | 1  | 6 |
| 156 | 74.281 | 1.27581 | 3 | 2  | 4 |
| 157 | 74.502 | 1.27258 | 0 | 4  | 6 |
| 158 | 74.718 | 1.26943 | 4 | 0  | 0 |
| 159 | 74.751 | 1.26895 | 1 | 2  | 6 |
| 160 | 74.887 | 1.26698 | 1 | 8  | 5 |
| 161 | 75.013 | 1.26516 | 2 | 5  | 5 |
| 162 | 75.316 | 1.26083 | 3 | 3  | 4 |
| 163 | 75.408 | 1.25952 | 1 | 14 | 1 |
| 164 | 75.545 | 1.25758 | 4 | 2  | 0 |
| 165 | 75.777 | 1.2543  | 3 | 7  | 3 |
| 166 | 75.784 | 1.2542  | 1 | 3  | 6 |
| 167 | 76.022 | 1.25086 | 0 | 14 | 2 |
| 168 | 76.038 | 1.25064 | 4 | 1  | 1 |
| 169 | 76.19  | 1.24852 | 2 | 12 | 2 |
| 170 | 76.547 | 1.24358 | 2 | 9  | 4 |
| 171 | 76.627 | 1.24249 | 1 | 11 | 4 |
| 172 | 76.655 | 1.24211 | 4 | 2  | 1 |
| 173 | 76.757 | 1.24071 | 3 | 4  | 4 |

---

|     |        |         |   |    |   |
|-----|--------|---------|---|----|---|
| 174 | 76.81  | 1.23998 | 3 | 9  | 2 |
| 175 | 77.006 | 1.23731 | 2 | 11 | 3 |
| 176 | 77.221 | 1.2344  | 1 | 4  | 6 |
| 177 | 77.276 | 1.23366 | 2 | 6  | 5 |
| 178 | 77.387 | 1.23217 | 3 | 10 | 1 |
| 179 | 77.679 | 1.22827 | 4 | 3  | 1 |
| 180 | 77.996 | 1.22406 | 2 | 13 | 1 |
| 181 | 78.007 | 1.22393 | 4 | 4  | 0 |
| 182 | 78.377 | 1.21907 | 1 | 9  | 5 |
| 183 | 78.63  | 1.21578 | 0 | 12 | 4 |
| 184 | 78.61  | 1.21604 | 0 | 6  | 6 |
| 185 | 78.597 | 1.21621 | 3 | 5  | 4 |
| 186 | 78.725 | 1.21455 | 1 | 14 | 2 |
| 187 | 78.72  | 1.21462 | 1 | 13 | 3 |
| 188 | 78.848 | 1.21296 | 3 | 8  | 3 |
| 189 | 79.058 | 1.21026 | 1 | 5  | 6 |
| 190 | 79.106 | 1.20965 | 4 | 4  | 1 |
| 191 | 79.144 | 1.20917 | 4 | 0  | 2 |
| 192 | 79.347 | 1.20658 | 4 | 1  | 2 |
| 193 | 79.557 | 1.20393 | 0 | 10 | 5 |
| 194 | 79.925 | 1.1993  | 2 | 7  | 5 |
| 195 | 79.956 | 1.19892 | 4 | 2  | 2 |

**Table S3.** Fractional atomic coordinates ( $x$ ,  $y$ ,  $z$ ) and main bond lengths (Å) for the orthorhombic structure of KY(MoO<sub>4</sub>)<sub>2</sub>.

|    | Coordinates |           |            | Bond length |           |       |          |
|----|-------------|-----------|------------|-------------|-----------|-------|----------|
|    | $x$         | $y$       | $z$        |             |           |       |          |
| K  | 0.5         | 0.268(1)  | 0.25       | K-O4(×2)    | 2.649(5)  | Mo-O1 | 1.787(4) |
| Y  | 0           | 0.0057(9) | 0.25       | K-O4(×2)    | 2.837(5)  | Mo-O2 | 1.971(6) |
| Mo | 0.526(7)    | 0.0988(4) | -0.014 (1) | K-O2(×2)    | 3.157 (5) | Mo-O3 | 1.815(5) |
| O1 | 0.790(7)    | 0.094(2)  | 0.134(6)   | Y-O1(×2)    | 2.163(5)  | Mo-O4 | 1.841(5) |
| O2 | 0.801(1)    | 0.072(2)  | -0.179(9)  | Y-O2(×2)    | 1.849(5)  |       |          |
| O3 | 0.232(1)    | 0.044(2)  | 0.016(1)   | Y-O3(×2)    | 2.310(7)  |       |          |
| O4 | 0.389(1)    | 0.189(2)  | -0.049(6)  | Y-O3(×2)    | 2.590(7)  |       |          |



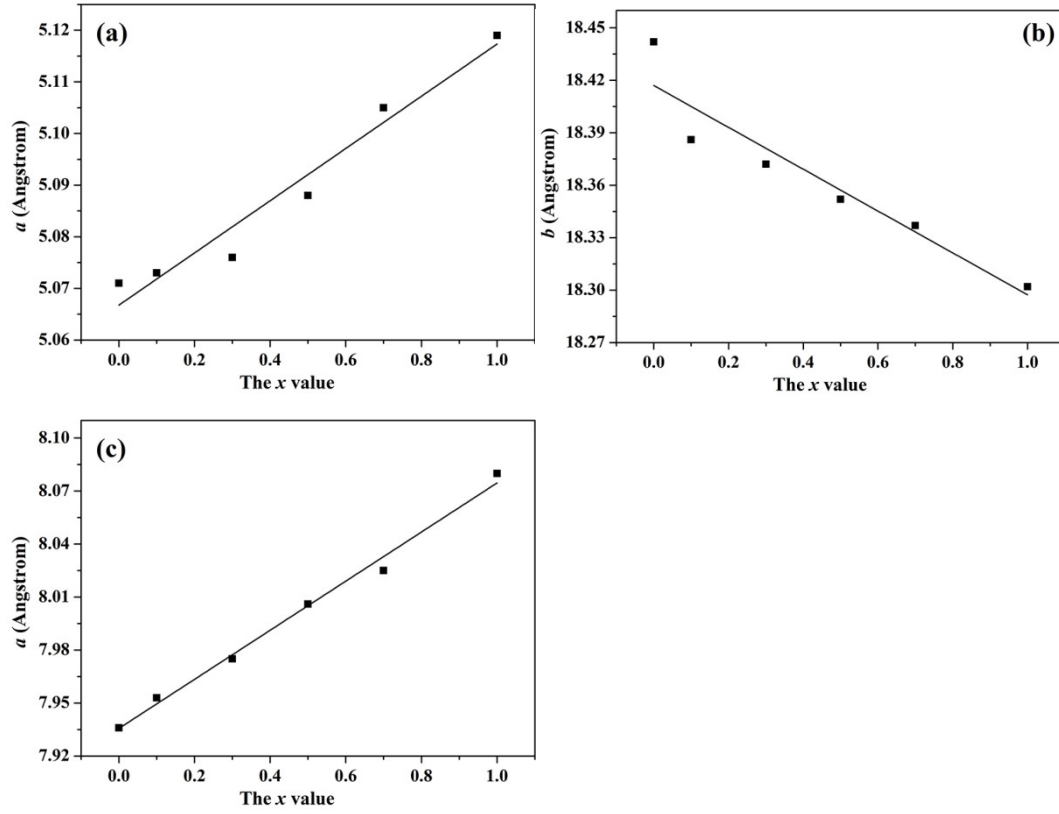

**Fig. S4.** The correlation of lattice parameters  $a$  (a),  $b$  (b) and  $c$  (c) with the Eu content ( $x$  value) for orthorhombic  $KY_{1-x}Eu_x(MoO_4)_2$ .

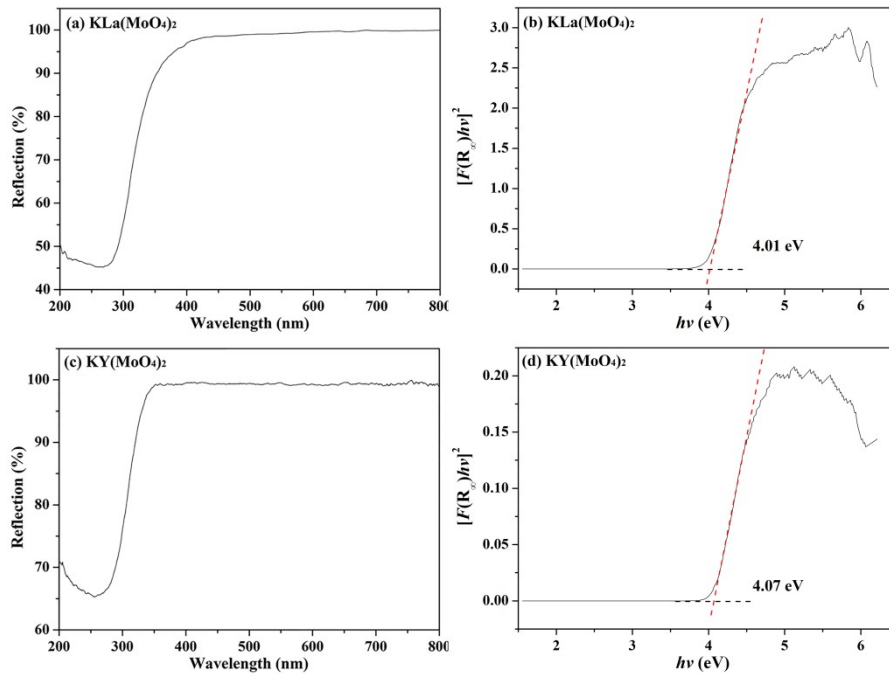

**Fig. S5.** Diffuse reflectance spectra (a, c) and  $[F(R_\infty)/hv]^2$  versus  $h\nu$  plots (b, d) for monoclinic  $KLa(MoO_4)_2$  (a, b) and orthorhombic  $KY(MoO_4)_2$  (c, d).

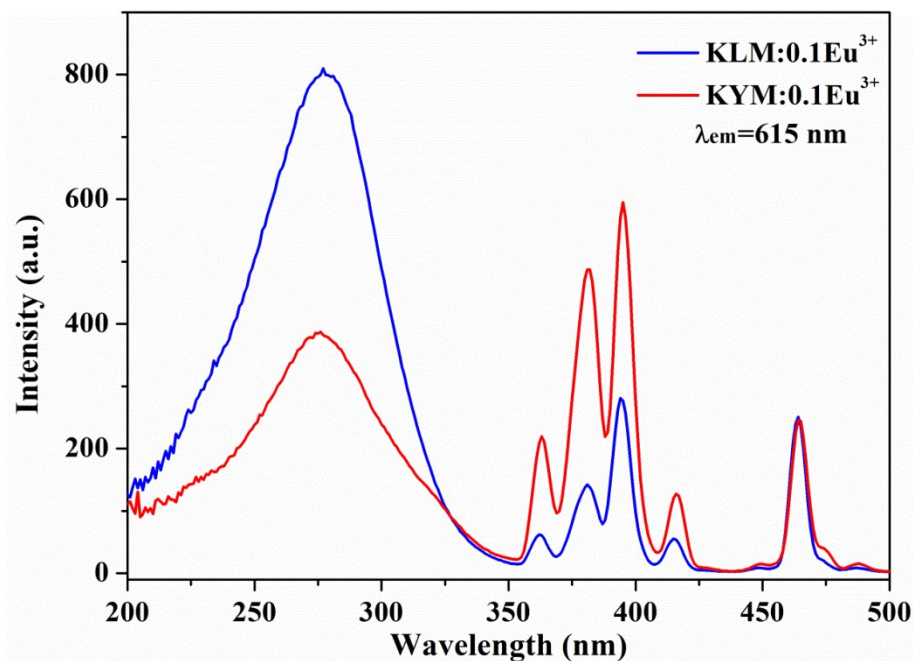

Fig. S6. PLE spectra of the KLM:0.1Eu and KYM:0.1Eu phosphors.

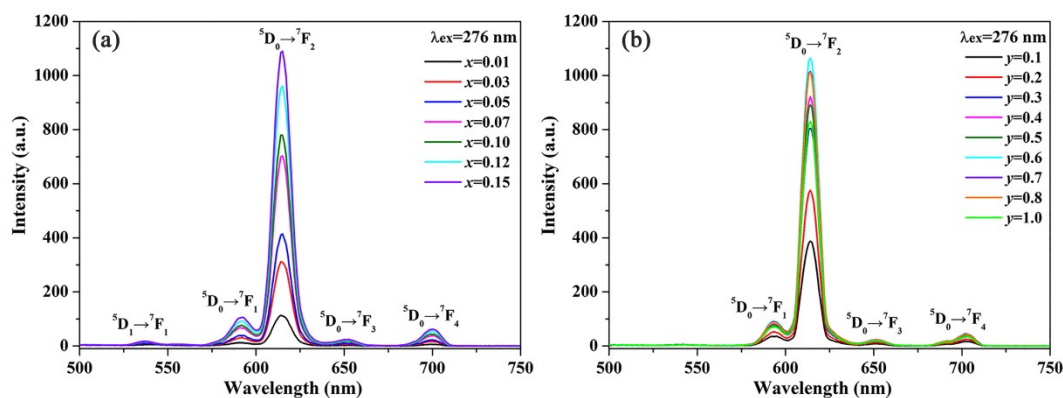

Fig. S7. PL spectra of the KLM: $x$ Eu (a) and KYM: $y$ Eu (b) phosphors under 276 nm excitation.

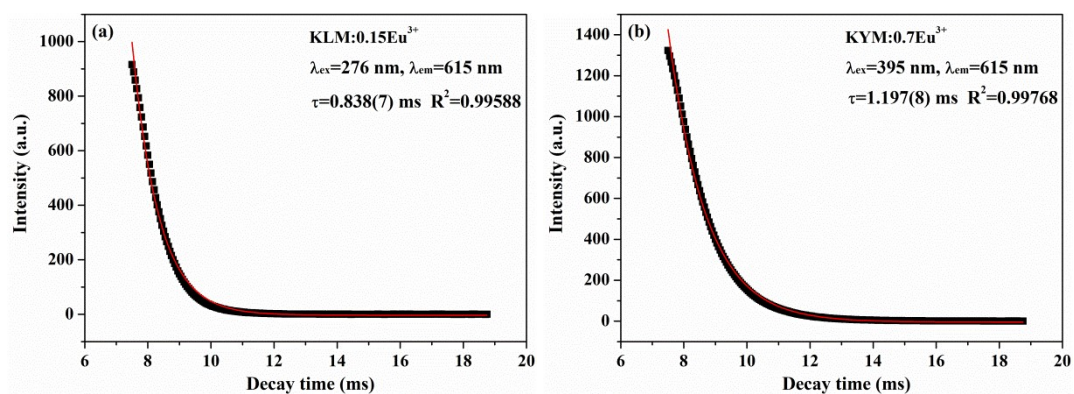

Fig. S8. Fluorescence decay curves for the 615 nm emission of KLM:0.15Eu (a) and KYM:0.7Eu (b).

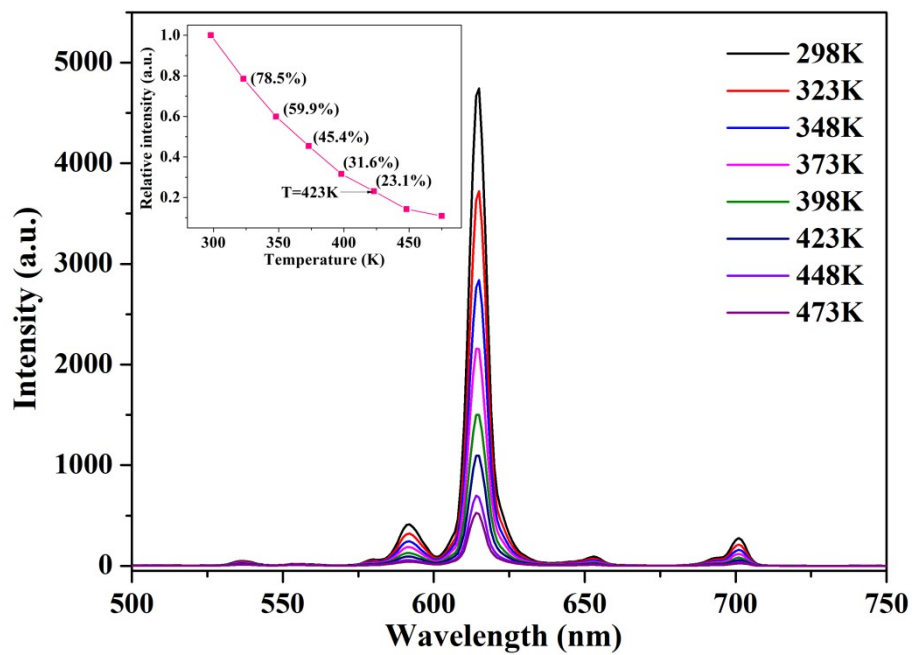

**Fig. S9.** Temperature-dependent PL spectra of the KLM:0.15Eu<sup>3+</sup> phosphor ( $\lambda_{\text{ex}}=276$  nm; 298-473 K). The inset shows the relative intensity of the 615 nm emission
